# Supplementary material for: Heteroatom-doped graphene oxide-based conductive ink: synthesis, characterization and investigation of the conductivity properties for flexible sensor technology
Source: Royal Society of Chemistry journal article supplement (doi:10.1039/d3nj01525d), 2023-01-01
Supplement: d3nj01525d1.pdf [file d3nj01525d1.pdf]

## **Supplementary Material**

**for**

### **Heteroatom-doped graphene oxide-based conductive ink: synthesis, characterization and investigation of conductivity properties for flexible sensor technology**

Selen Uruc<sup>a,b</sup>, Ebrar Dokur<sup>a</sup>, Rabianur Kurteli<sup>a</sup>, Ozge Gorduk<sup>a</sup>, and Yucel Sahin<sup>a\*</sup>

<sup>a</sup>Department of Chemistry, Faculty of Arts and Science, Yildiz Technical University,  
TR34220 Istanbul, Türkiye.

<sup>b</sup>Department of Basic Pharmaceutical Sciences, Faculty of Pharmacy, Biruni University  
Istanbul, Türkiye.

#### **\*Corresponding Author:**

Yucel Sahin

Tel: +90 212 3834411

Fax: +90 212 3834134

\*e-mail: [yucelsahin06@gmail.com](mailto:yucelsahin06@gmail.com)

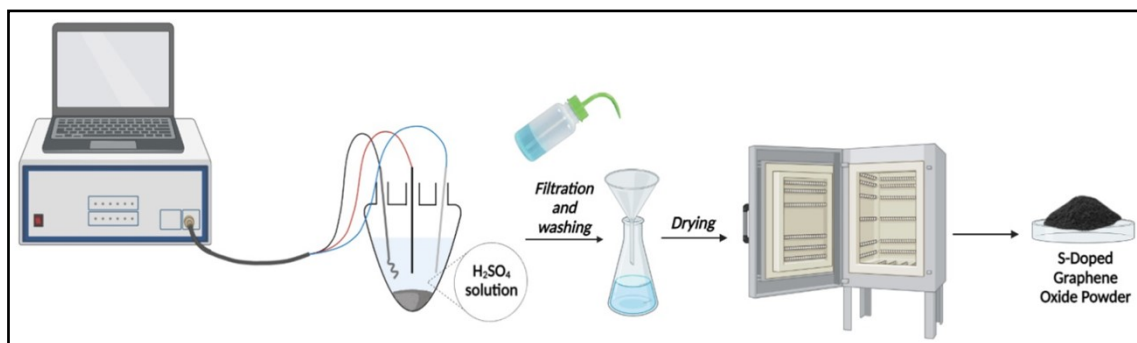

**Scheme S1.** Schematic illustration of electrochemical S-doped graphene oxidation production.

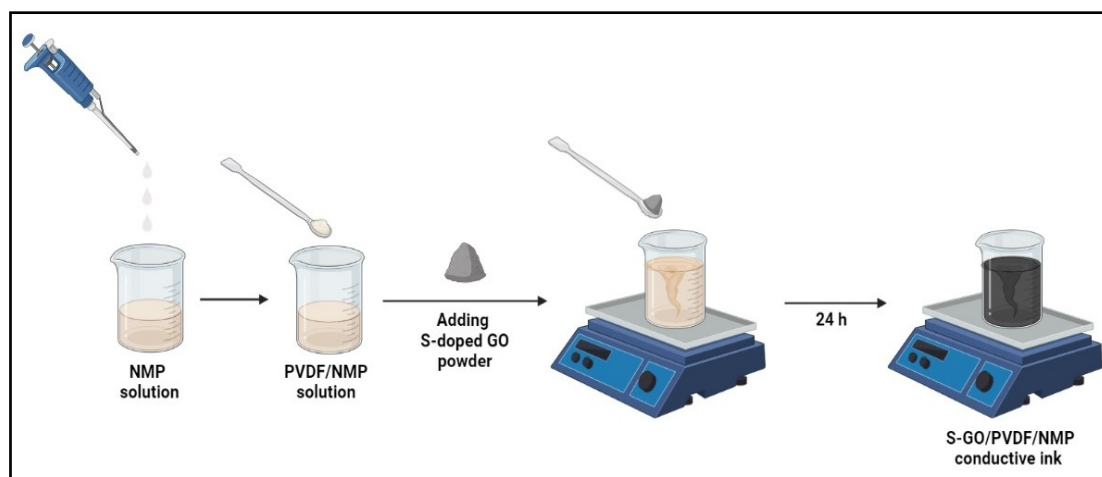

**Scheme S2.** Preparation of S-GO/PVDF/NMP conductive ink.

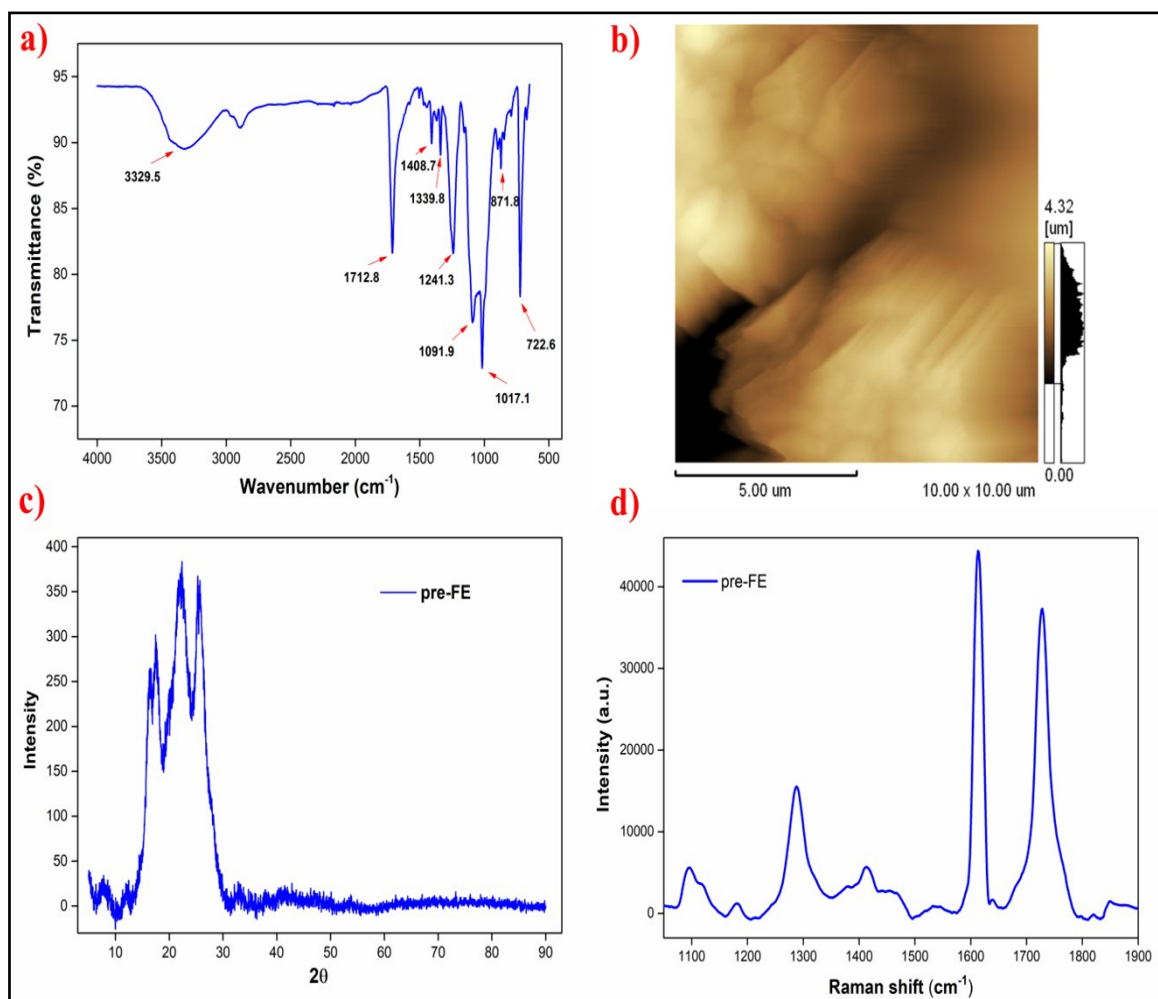

**Fig. S1.** a) FTIR spectrum of pre-FE, b) 2D AFM images of CFE-5, c) X-ray powder diffraction pattern and d) Raman spectrum of pre-FE.

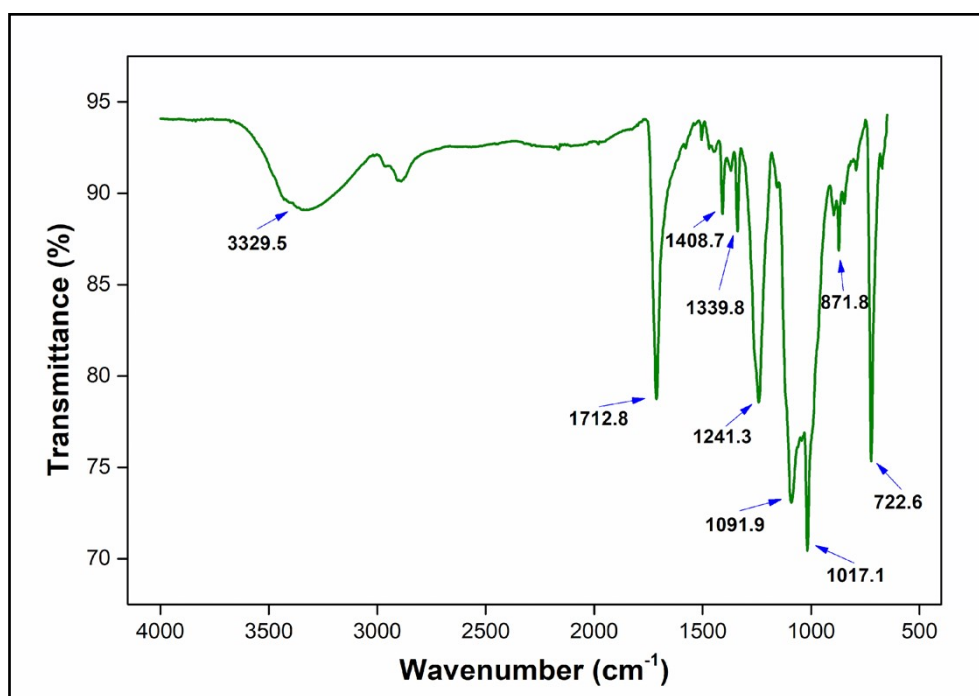

**Fig. S2.** FTIR spectrum of fabric electrode (FE).

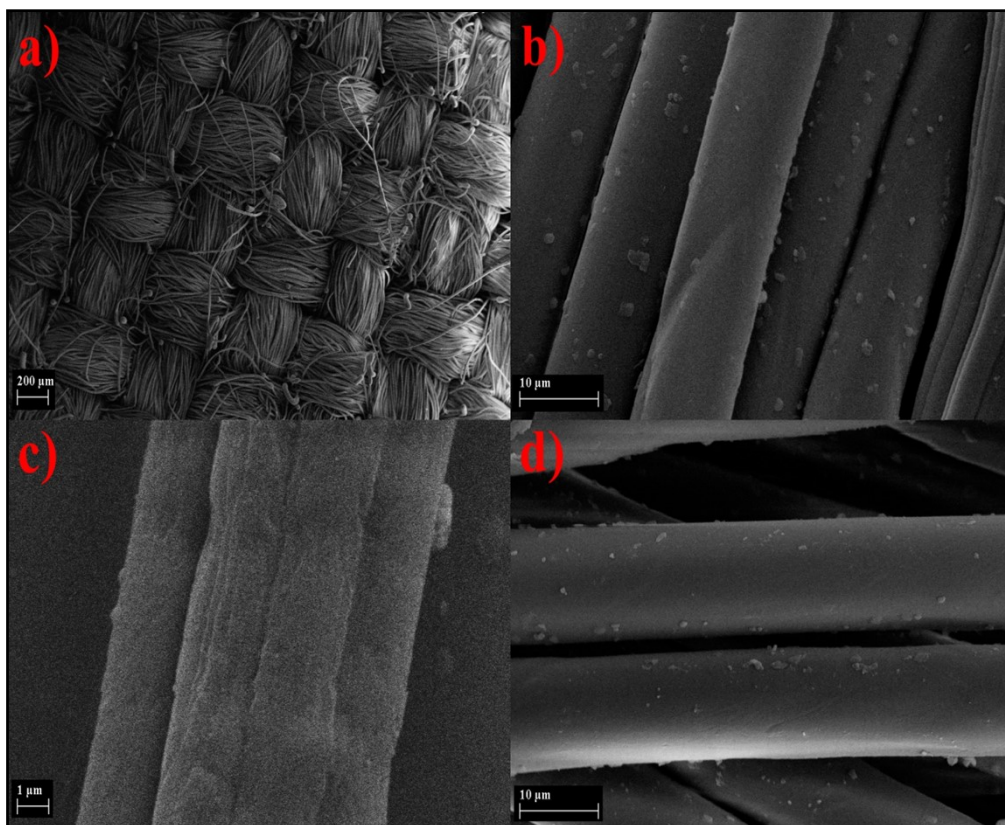

**Fig. S3.** SEM images at different magnifications of fabric electrode (FE).

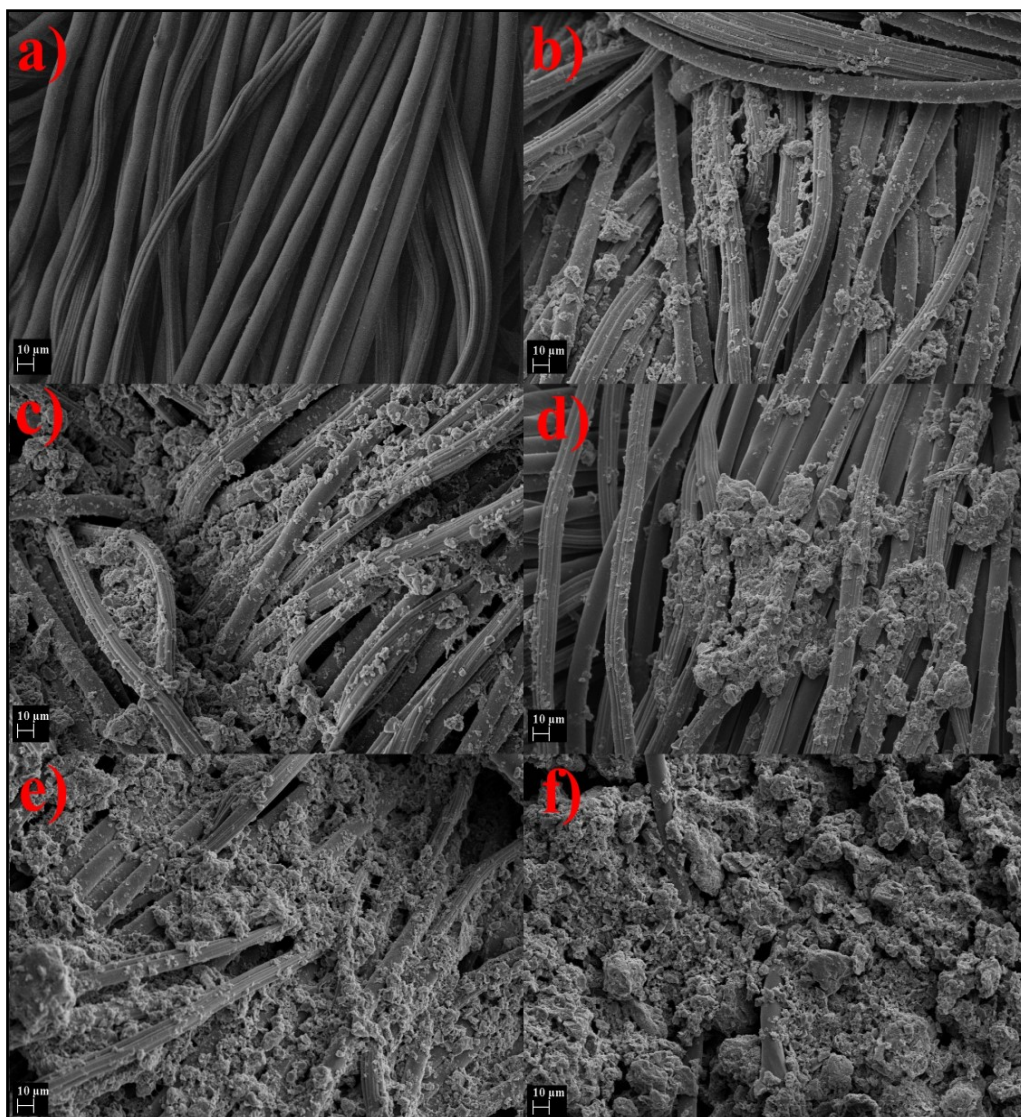

**Fig. S4.** SEM images at 1000x magnification of a) pre-FE, b) CFE-1, c) CFE-2, d) CFE-3, e) CFE-4, and f) CFE-5.



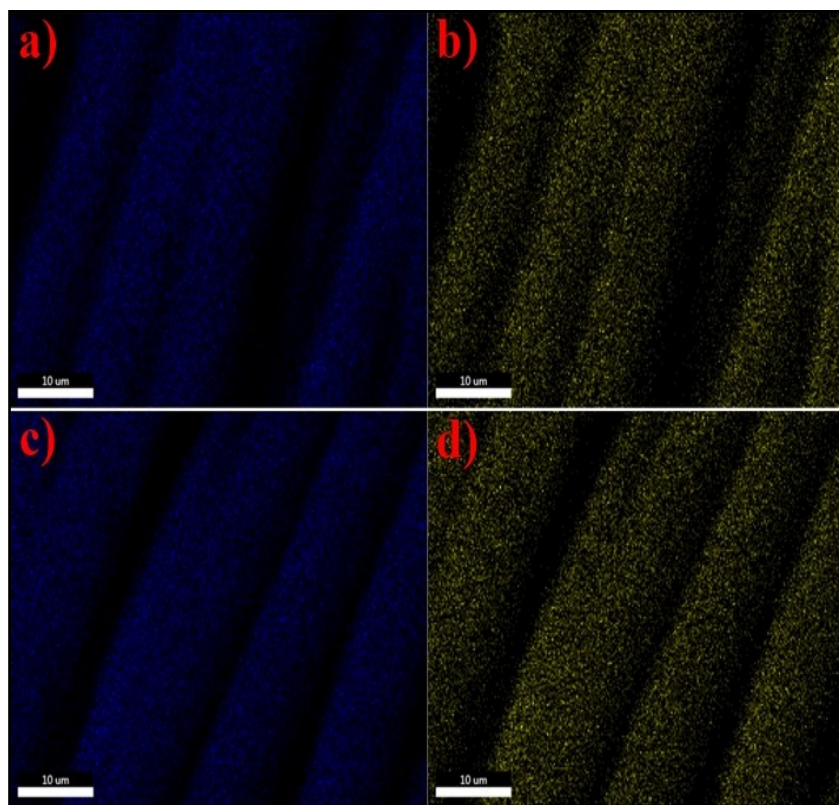

**Fig. S5.** EDS mapping of a) C element (66%) and b) O element (34%) of FE; c) C element (68%), and d) O element (32%) of pre-FE.



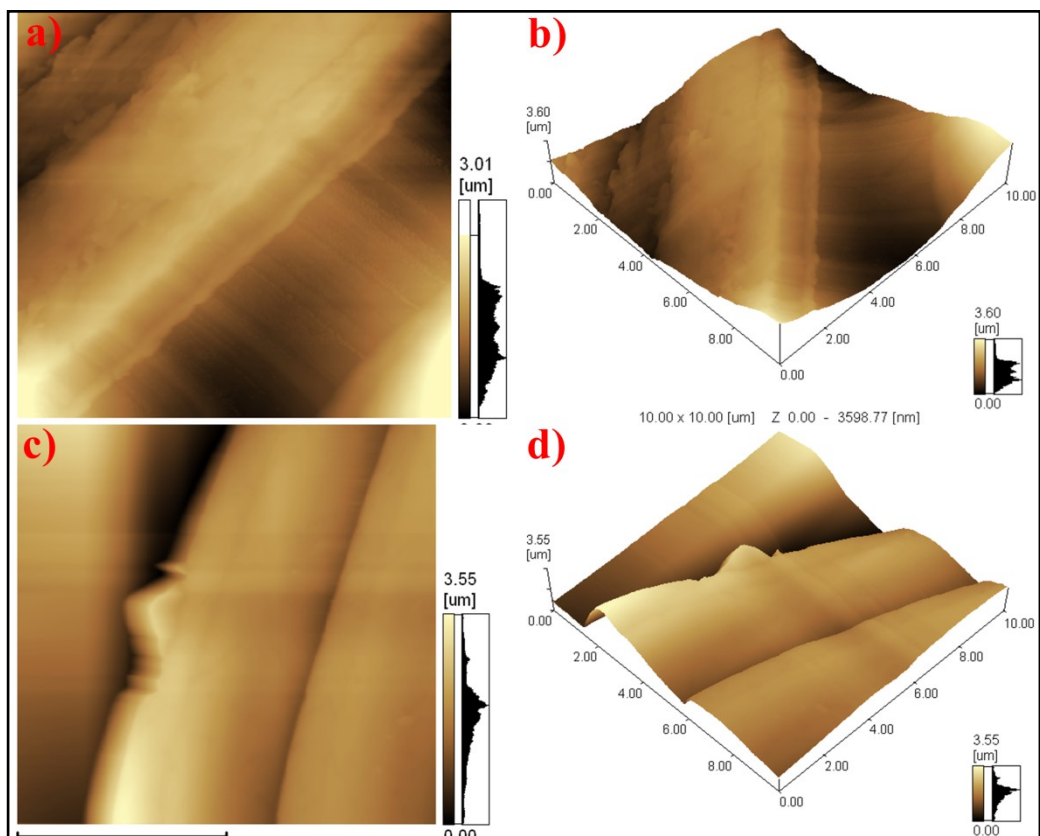

**Fig. S6.** a) 2D and b) 3D AFM images of FE; c) 2D and d) 3D AFM images of pre-FE.

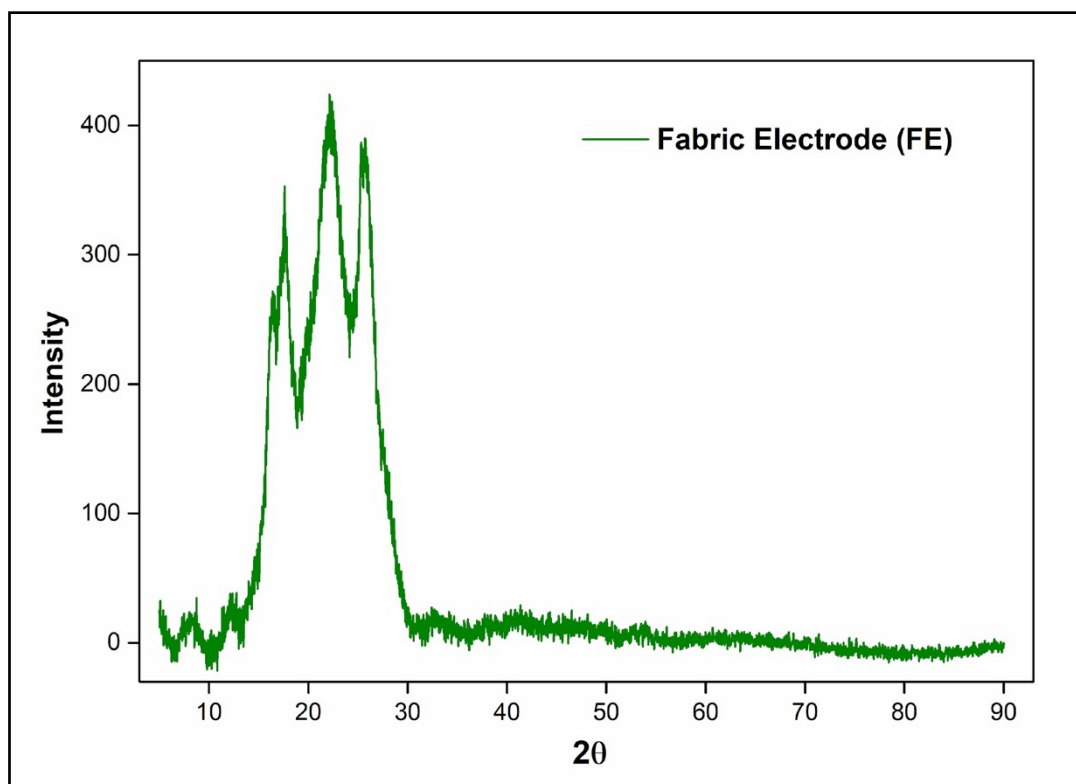

**Fig. S7.** X-ray powder diffraction pattern of the fabric electrode (FE).

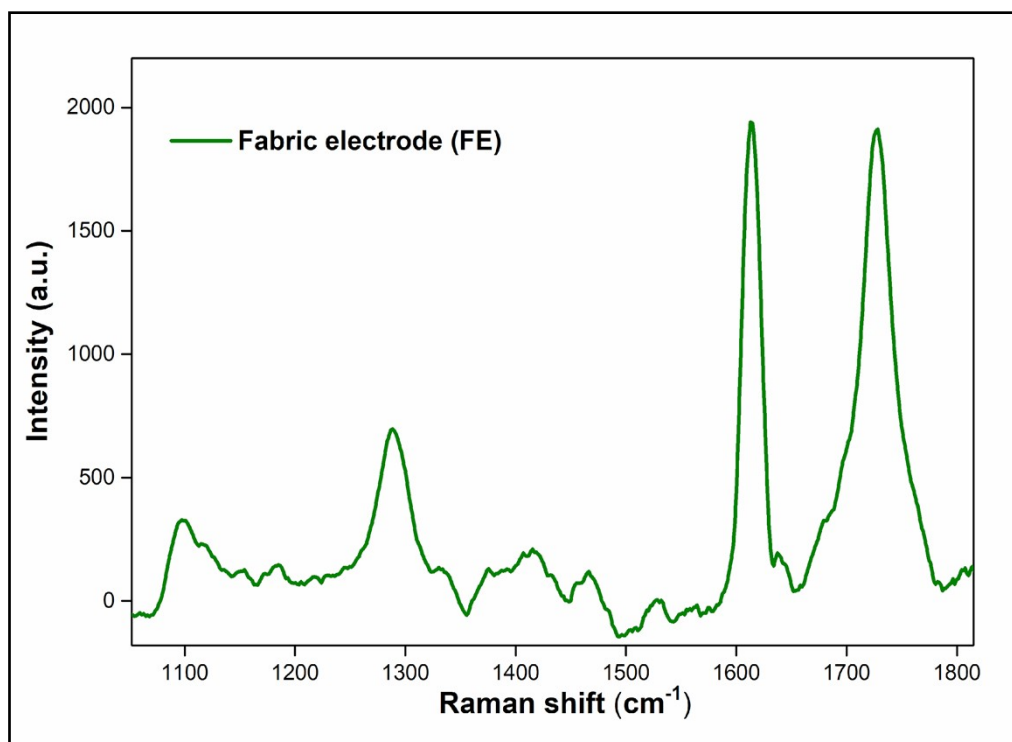

**Fig. S8.** Raman spectrum of fabric electrode (FE).

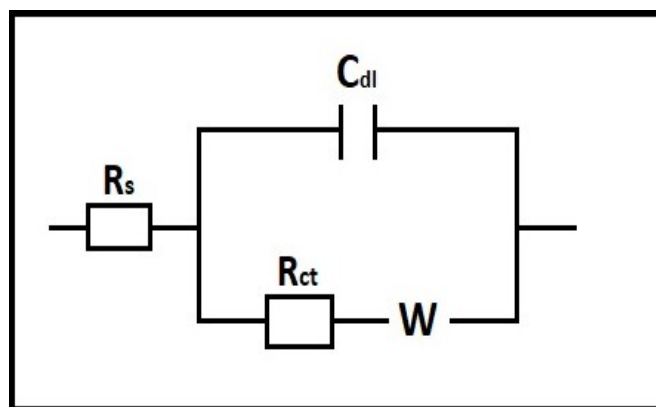

**Fig. S9.** Simple circuit model used in EIS measurements.

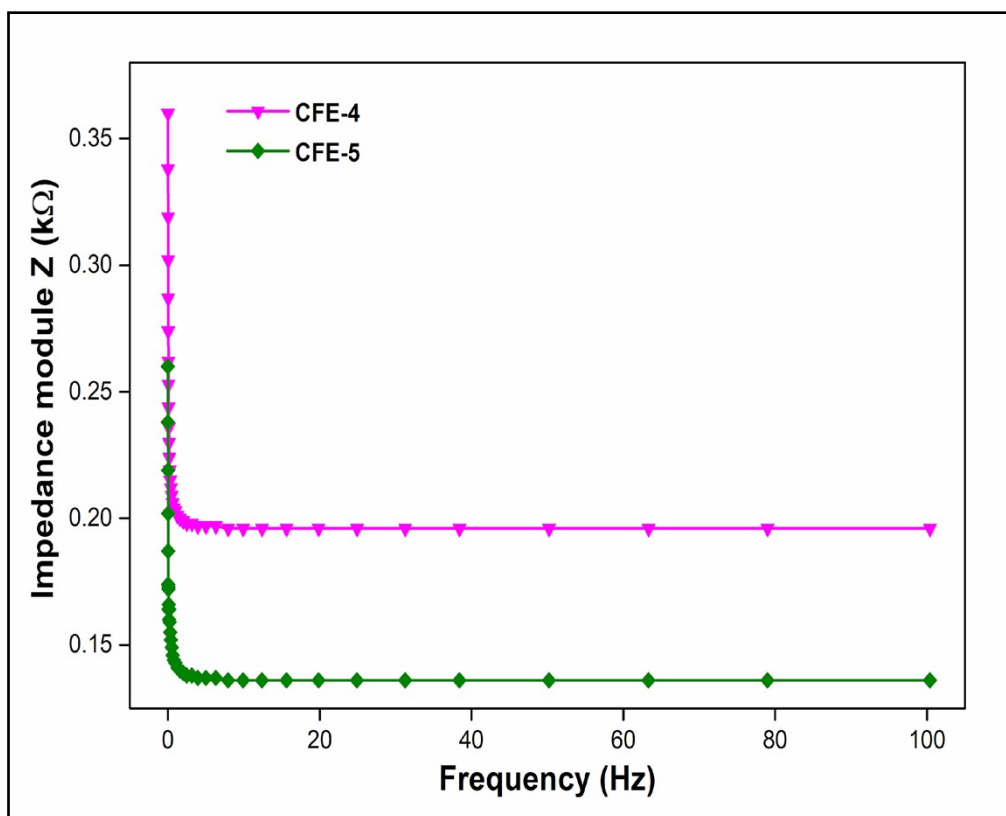

**Fig. S10.** Bode CFE-4 and CFE-5. Measurements were recorded with a traditional three-electrode system in 0.1 M  $H_2SO_4$  solution, frequency range from  $10^4$  Hz to  $10^{-2}$  Hz.
